1 **Extracellular Vesicle-delivered Bone Morphogenetic Proteins: A**  
2 **novel paracrine mechanism during embryonic development**

3

4 Thomas Draebing<sup>1,2</sup>, Jana Heigwer<sup>1,2</sup>, Lonny Juergensen<sup>1</sup>, Hugo Albert Katus<sup>1,2</sup>, David  
5 Hassel<sup>1,2</sup> \*

6

7 <sup>1</sup> Department of Internal Medicine III, University Hospital Heidelberg, 69120  
8 Heidelberg, Germany

9 <sup>2</sup> DZHK (German Centre for Cardiovascular Research), Partner Site  
10 Heidelberg/Mannheim, 69120 Heidelberg, Germany.

11 \* Correspondence: david.hassel@gmail.com

12

13 **Morphogens including Wnt, Hedgehog and BMP proteins are essential**  
14 **during embryonic development and early induction of organ**  
15 **progenitors. Besides free diffusion to form signalling gradients,**  
16 **extracellular vesicle- (EV-) mediated morphogen transport was**  
17 **identified as a central mechanism for Wnt- and Hh-signalling. Here, we**  
18 **investigated EVs isolated from whole zebrafish embryos as a potential**  
19 **morphogen transport mechanism. Inhibition of EV-secretion during**  
20 **development leads to severe dorsalization phenotypes, reminiscent of**  
21 **disrupted BMP-signalling. Subsequently, we found that EVs isolated**

22 **from zebrafish embryos at bud stage contain biologically active BMP2/4**  
23 **protein. Embryos with inhibited EV secretion display reduced**  
24 **Smad1/5/9-phosphorylation and downstream gene expression activity.**  
25 **We further show that BMP-containing EVs are secreted by endodermal**  
26 **cells *in vitro*, and inhibition of endodermal-EV release *in vivo* causes**  
27 **signs of BMP signalling loss. Our data provides evidence that establishes**  
28 **the transport of BMP2/4 by EVs as an essential but so far undiscovered**  
29 **mechanism in developmental morphogenesis.**

## 30 **Introduction**

31 During embryogenesis, a diverse set of cells originates from a single cell of origin. A  
32 major task during development is to ensure the correct position and fate of cells. The  
33 initially seemingly identical cells start to express a specific set of genes, thereby  
34 differentiating into new cell types. This process follows a specific pattern and requires  
35 intensive regulation and communication between cells and tissues<sup>1</sup>. Molecules  
36 mediating tissue patterning are called morphogens. A hallmark of morphogens is to  
37 form a gradient<sup>2</sup> and to thereby activate concentration dependent signalling  
38 responses<sup>3,4</sup>.

39 The formation of morphogen gradients is facilitated by multiple components and  
40 mechanisms, which are still not fully understood. Extracellular morphogens are  
41 typically thought to be secreted into the extracellular space as freely diffusing,  
42 unpackaged proteins<sup>5,6</sup>. First models described the gradient formation by diffusion

43 and uptake of morphogens by cells either at the end ('source-sink' model<sup>7</sup>) or along  
44 the gradient ('synthesis-diffusion-degradation' model<sup>7, 8</sup>). More recent findings added  
45 more complexity to the existing models. Several soluble and membrane-bound  
46 proteins were found to bind morphogens. Depending on the binding factor and  
47 context the binding can lead to opposing effects. Thus, binding of bone  
48 morphogenetic proteins (BMPs) to Chordin inhibits receptor binding<sup>9, 10</sup>, but can also  
49 facilitate increased diffusion rates<sup>11</sup>. BMPs also bind to plasma membrane-bound  
50 heparan sulphate proteoglycans (HSPGs), which removes the ability to diffuse freely<sup>12</sup>,  
51 <sup>13</sup>. Knockout of HSPGs however also disrupts BMP-signalling<sup>12, 13</sup>.

52 Recently, the morphogens Wnt, TGF- $\beta$  and Hedgehog have been reported to reside in  
53 extracellular vesicles (EVs)<sup>14-17</sup>. The term EV describes a superfamily of vesicles that  
54 are characterized by their secretion from cells<sup>18</sup>. EVs include microvesicles (MV) and  
55 exosomes among other subtypes. Currently the different types of EVs are mainly  
56 characterized by their size, content and cellular compartment, in which they are  
57 synthesized. MVs are between 100 - 1.000 nm in size and are formed and shed at the  
58 plasma membrane of the secreting cell<sup>19, 20</sup>. Exosomes are the smallest kind of vesicles  
59 with a diameter of 50-150 nm in size<sup>19, 20</sup>. They form inside multivesicular bodies  
60 (MVBs), a part of the endosomal pathway, which can fuse with the plasma membrane,  
61 thereby releasing the exosomes<sup>21</sup>. The increasing attention EVs received during recent  
62 years is mostly due to their function in transporting specific sets of multiple  
63 biomolecules to target cells over long distances<sup>22-25</sup>. The transport of multiple  
64 molecules by the same vehicle allows the reliable delivery of complex and fine-tuned  
65 signals, while packaging of signalling molecules inside EVs might protect them from

66 degradation and antagonists. Investigating the role of EVs in morphogenetic signalling  
67 may thus reveal an additional way of fine tuning morphogenesis during development.  
68 Here we report that BMP2 and/or BMP4 (BMP2/4) are secreted in exosome-like EVs  
69 *in vitro* and *in vivo* during embryogenesis. This EV-associated BMP was functionally  
70 active and activated BMP-dependent transcription in cells. Inhibiting EV-release  
71 strongly disturbed BMP-signalling in zebrafish, leading to phenotypes similar to the  
72 phenotypes caused by dorsomorphin, a BMP inhibitor. We postulate that EV-  
73 association of BMP is an additional tool to shape the BMP gradient.

74

## 75 **Results**

### 76 **Zebrafish secrete EVs during development**

77 To investigate the role of EVs during embryonic development, we chose the zebrafish  
78 as a well-established model in developmental research<sup>26</sup>. EV isolation protocols  
79 established so far are mostly optimized to purify EVs from biofluids, like blood plasma  
80 or cell culture media, while only limited options exist for purifying EVs from solid  
81 tissue<sup>27, 28</sup>. We adapted existing EV isolation procedures to establish a protocol that  
82 allowed us an enzyme-free isolation of EVs from early-stage zebrafish embryos by  
83 using EDTA and mild shear forces to dissociate embryonic cells, thereby freeing EVs  
84 (Figure 1A). EVs were then isolated by sequential ultracentrifugation<sup>14, 28</sup>.  
85 Nanoparticle tracking analysis (NTA) demonstrated an enrichment of particles with a  
86 mode size of 140.3 nm in the isolates, which is within the size range of exosomes  
87 (Figure 1B). Electron microscopy showed vesicles of smaller than 200 nm in size,

88 presenting the typical cup-like shape as previously described for EVs<sup>28</sup> (Figure 1C).  
89 Western blot analysis additionally showed the presence of the EV-proteins TSG101,  
90 Lamp1 and ALIX in both cell lysate and EV isolates, while the endoplasmic reticulum  
91 (ER)-marker GP96 was only present in cell lysate, but not in EVs (Figure 1D). This data  
92 indicates a pure EV-isolate with strong enrichment of exosome-like particles secreted  
93 by zebrafish embryos.

94

### 95 **Inhibition of EV-secretion in zebrafish embryos causes a phenotype resembling** 96 **dysfunctional BMP-signalling**

97 To evaluate the relevance of EVs during embryonic development, we inhibited EV-  
98 secretion by morpholino-based knock down of Rab11a and Rab35. Rab11a and Rab35  
99 are known to be essential for fusion of the multi vesicular body (MVB) with the plasma  
100 membrane and therefore are well-established molecular targets to block EV-release  
101 into the interstitium<sup>29-31</sup>. To validate the inhibition of EV secretion, EVs were isolated  
102 from 130 control- or morphant embryos and compared on the basis of the amount of  
103 ALIX present in the samples as determined by western blotting (Figure 2A). EV-isolates  
104 of Rab11a-morphants (125  $\mu$ M MO-Rab11a) showed a non-significant reduction in  
105 ALIX content ( $-14.3 \pm 20.7$  %) (mean  $\pm$  standard deviation). Rab35-morphants (250  $\mu$ M  
106 MO-Rab35) however presented a significant reduction of  $49.2 \pm 29.2$  % and were used  
107 in further experiments (Figure 2B). The knockdown (KD) of Rab35 resulted in a  
108 dorsalization phenotype with varying penetrance and severity (Figure 2C). Classifying  
109 phenotype severity using the dorsalization categories published by Mullins et al.<sup>32</sup>  
110 indicated that 34.0 % of the morphants presented severe dorsalization (C4-5), 8.2 %

111 with weak dorsalization (C1-3) and 27.8 % were dead, while only 29.9 % presented no  
112 dorsalization phenotype (Figure 2C). Dorsalization is a typical sign of dysfunctional  
113 morphogen signalling during dorso-ventral-patterning, especially of reduced BMP2,  
114 BMP4 or BMP7-signalling activity<sup>33-36</sup>. Inhibition of BMP signalling by dorsomorphin  
115 during embryonic development resulted in an identical phenotype (Figure 2C).

#### 116 **EVs in zebrafish embryos at bud stage contain BMPs**

117 To assess whether BMPs are transported by embryonic zebrafish EVs, we performed  
118 western blotting of zebrafish EVs secreted at bud stage (10 hpf). The antibody was  
119 chosen to recognize the mature domain of BMP2, allowing the detection of both  
120 processed and unprocessed BMP2. Since the mature domain of BMP2 and BMP4 are  
121 nearly identical, the antibody detected both BMPs. Thus, we will refer to the detected  
122 BMPs as BMP2 and/or BMP4 (BMP2/4). Surprisingly, we detected the BMP2/4-  
123 precursor as well as the mature BMP2/4 ligand (Figure 2D). To confirm that BMP2/4  
124 is associated to EVs and not purified as a contaminant, the crude EV-suspension was  
125 separated on an OptiPrep<sup>®</sup>-gradient (Figure 2E). BMP2/4 mainly co-purified within the  
126 same fractions as TSG101 at a density of 1.13 - 1.18 g/mL, which was previously  
127 described for EVs<sup>19, 28</sup>. In Rab35-morphants the amount of BMP2/4 in EV-isolates was  
128 significantly reduced as compared to EV-isolates obtained from control zebrafish,  
129 while BMP2/4-levels remained constant in the cell lysate of the same embryos (Figure  
130 2F,G). Rab11-KD on the other hand did not reduce the amount of BMP2/4 in EV-  
131 isolates.

132 To demonstrate the biological activity of EV-associated BMP, we performed a dual  
133 luciferase reporter assay in HEK293A cells using a construct expressing Firefly

134 Luciferase under the control of BMP-responsive elements (BRE)<sup>37</sup>. Since zebrafish EVs  
135 might not actually be endocytosed by HEK293A-cells, we verified the uptake by  
136 labelling the EVs using PKH26 and imaged EV-treated cells after 5 h (Figure 2H). The  
137 cells showed a large number of fluorescent punctae, resembling endosomes, inside  
138 their cytosol, thereby indicating EV uptake. HEK293A cells were transfected with  
139 pGL3-BRE:Luciferase and pIS2-Renilla and subjected to a 16 h-treatment with either  
140 PBS or EVs isolated from zebrafish at bud stage. The EV-treatment resulted in a  
141 significant, dose-dependent increase in luciferase activity indicating that EV-delivered  
142 BMP indeed is able to activate BMP-dependent transcription (Figure 2I).

#### 143 **EV-transport of BMP2/4 is required for BMP-signalling during development**

144 To address the hypothesis that BMP signalling is reduced by inhibition of EV-secretion,  
145 we used *Nkx2.5*, a transcriptional target of BMP2/4, as a readout to measure BMP-  
146 activated transcriptional activity in Rab35-morphants. Whole mount *in situ*  
147 hybridisation (WISH)-stainings of *nkx2.5* at the 7-somite stage (7SS) resulted in a  
148 typical staining with two parallel stripes along the midline, representing cardiac  
149 progenitor cells, in wildtype zebrafish embryos and control morphants<sup>38</sup> (Figure 3A).  
150 In Rab35-morphants we found the *nkx2.5*-positive areas to be smaller and situated  
151 more laterally (Figure 3A). Quantification of the *nkx2.5*-staining showed a significant  
152 reduction of the *nkx2.5*-expression to a median of 36.9 % (Quantiles (25 % - 75 %):  
153 12.4 – 87.8 %) in Rab35-morphants as compared to wildtype zebrafish embryos. These  
154 results suggested that inhibition of EV-secretion results in reduced BMP-mediated  
155 transcriptional activity.

156 A well-observable and strong BMP-signalling event during early zebrafish  
157 development happens in the tail bud during tail development<sup>39</sup>. We used whole  
158 mount immunofluorescence stainings to detect phosphorylated Smad1/5/9  
159 (pSmad1/5/9) in the tail bud of 7SS zebrafish embryos as an additional measure of  
160 BMP-signalling activity (Figure 3C). Again, while levels of pSmad1/5/9 were  
161 indistinguishable in wildtype and MO-Cntr-injected zebrafish, Rab35-KD significantly  
162 reduced the overall Smad1/5/9-phosphorylation in the tail bud to 45.4 % (Quantiles  
163 (25 % - 75 %): 28.4 – 77.0 %) (Figure 3D).

164 Taken together, these experiments strongly suggest that EVs play a crucial role in  
165 mediating BMP signalling activity and that EV-mediated BMP signalling is significantly  
166 involved in early cardiac progenitor cell induction.

#### 167 **Endoderm cells secrete EVs containing BMP2/4**

168 BMP2 responsible for activating the transcription of Nkx2.5 in cardiac mesoderm cells  
169 is known to originate from the endoderm<sup>40-42</sup>. Since the EV isolation protocol for  
170 zebrafish embryos does not allow purification of EVs originating from a specific tissue  
171 or cell type, we used the mouse endodermal cell line End2 as an endodermal *in vitro*  
172 model<sup>43</sup>. Using western blotting, we verified the purity of the End2-EVs purified from  
173 cell culture medium (Figure 4A). Western blotting also confirmed that BMP2/4 was  
174 present in EVs isolated from End2-cells. The purity of End2-EV isolates was further  
175 asserted by electron microscopy (Figure 4B) and NTA measurements (Figure 4C),  
176 confirming an enrichment of particles smaller than 200 nm with a mode diameter of  
177 140.6 nm. On an OptiPrep<sup>®</sup>-gradient BMP2/4 largely co-purified in the same fractions  
178 as the EV-markers Flot1 and ALIX, suggesting their association (Figure 4D).



179 PKH26-labeling again confirmed the uptake of End2-derived EVs by HEK293A-cells  
180 (Figure 4E), providing the basis for dual luciferase assays to test BMP-activity. As  
181 expected, the BMP-activity assay verified the ability of End2-EVs to activate BMP-  
182 dependent transcription (Figure 4F). Further, fluorescently labelled BMP2 (Venus-  
183 BMP2) expressed in End2-cells was detected in EV-isolates. After treatment of  
184 HEK293A-cells with PKH26-labelled EVs from Venus-BMP2-expressing End2-cells,  
185 overlapping fluorescent signals for PKH26 and Venus were found in the HEK293A-cells,  
186 again confirming EV and BMP 2/4 association (Figure 4G).

187 **Endoderm-specific inhibition of EV-secretion dampens Smad1/5/9-phosphorylation**  
188 **in the zebrafish tail bud *in vivo***

189 To assess the significance of the endoderm as a source of EV-associated BMP2/4 *in*  
190 *vivo* we injected zebrafish embryos with a plasmid construct expressing a dominant  
191 negative variant of Rab35 (Rab35<sup>N120I</sup>)<sup>29</sup> tagged with an N-terminal GFP (GFP-Rab35<sup>dn</sup>).  
192 An endoderm-specific expression was achieved by using the *sox17*-promoter<sup>44</sup>. Since  
193 zebrafish stably expressing GFP-Rab35<sup>dn</sup> were not viable, transient expression was  
194 used instead, leading to a mosaic expression pattern only. Nevertheless, the  
195 expression of Rab35<sup>dn</sup> in the endoderm resulted in a similar phenotype as the  
196 ubiquitous Rab35-KD (Figure 5A, S1A), indicating that the endoderm is an important  
197 source for EVs involved in BMP-signalling. Surprisingly, overexpressing the wildtype  
198 form of Rab35 in the endoderm also increased the mortality and number of dorsalized  
199 embryos, although to a lesser extent than Rab35<sup>dn</sup>.

200 Immune fluorescence stainings against pSmad1/5/9 showed that the expression of  
201 GFP-Rab35<sup>dn</sup> in contrast to expression of GFP or GFP-Rab35 resulted in morphological

202 changes and reduced fluorescence in the tail bud (Figure 5B). Quantification of the  
203 pSmad1/5/9 distribution and intensity in the tail bud validated these initial  
204 observations (Figure 5C). Interestingly, no overlap of the transgene-expressing cells  
205 with cells positive for pSmad1/5/9 was needed to cause the observed phenotype,  
206 indicating that a paracrine effect might be the cause for the reduced Smad1/5/9-  
207 phosphorylation (Figure S1C). Thus, our results suggest that endoderm-derived EVs  
208 are required for BMP-signalling during zebrafish development.

### 209 **BMP2/4 is tethered to EV surfaces by binding to HSPGs**

210 BMPs, other than Wnts or Hh, do not possess a lipid anchor, with which they can bind  
211 to EV-membranes<sup>45-47</sup>. However, BMPs are known to bind to heparan sulphate  
212 proteoglycans (HSPGs) on cell surfaces<sup>13, 48, 49</sup>. Since HSPGs are present on EV-surfaces  
213 as well<sup>50</sup>, we investigated whether BMPs are tethered to EVs by HSPGs. We divided  
214 End2-EV isolates into two equal fractions. Fraction I was treated with Heparinase 3,  
215 which cleaves off the sugar chains of HSPGs to which BMPs are bound<sup>51</sup>. Fraction II  
216 was used as a control. If HSPGs are present and are responsible in linking BMPs to EVs,  
217 Heparinase 3 treatment should result in the decrease in BMP signal using western  
218 blot. Heparinase 3-treatment indeed led to a decrease in BMP2/4 in the EV-isolate  
219 (Figure 6A,B), indicating that BMP2/4 is tethered to the EV surface in part by binding  
220 to HSPGs.

221

## 222 Discussion

223 Here, we report that BMP2 and/or BMP4 are transported by EVs during zebrafish  
224 development, a mechanism that was essential for BMP-dependent morphogenetic  
225 signalling during zebrafish development. We further provide a mechanism of  
226 tethering morphogens without lipid-modification to EVs.

227 Morphogenetic signalling has been investigated for over a century and while it is  
228 commonly accepted that diffusion gradients are a hallmark feature of morphogen  
229 signalling, the mechanisms behind the formation of morphogen gradients are still not  
230 definitely resolved<sup>8, 52</sup>. Differences in morphogen gradient formation do not only  
231 occur between different morphogens, but also between morphogenetic signalling  
232 events facilitated by the same morphogen. The Dpp-gradient during the dorso-  
233 ventral-patterning in drosophila, for example, is formed within 30 min by an active  
234 shuttling mechanism involving Sog<sup>53, 54</sup>. In the imaginal wing disc on the other hand,  
235 the Dpp-gradient needs 4 h to form, which is thought to happen by a different unaided  
236 mechanism<sup>55</sup>. Several additional models were proposed based on experimental  
237 observations. This includes the Source-Sink-model<sup>7, 56, 57</sup>, the Counter-Gradient-  
238 model<sup>56-58</sup>, restricted diffusion<sup>11, 12</sup>, transcytosis<sup>59</sup>, cytoneme transport<sup>60</sup> and more  
239 recently also vesicular transport<sup>14-16, 61</sup>. This role of EVs in morphogenetic signalling is  
240 by now a well-established mechanism after Wnt-proteins and Hh were found in EVs,  
241 a mechanism that allows these lipid-modified proteins to diffuse efficiently without  
242 unspecifically binding to membranes<sup>14-16</sup>. The observation that BMPs, that do not  
243 possess a lipid anchor, are transported by EVs as well, indicates that masking lipid  
244 groups is not the only function of EVs in morphogenetic signalling. EVs might be

245 needed to mobilize BMP that is bound to HSPGs on cell surfaces and thus restricted in  
246 their diffusion.

247 Multiple proteomics studies detected BMP in EVs but did not investigate this finding  
248 in detail<sup>62-69</sup>. Furthermore, the secretion of BMPs in matrix vesicles, a specialized type  
249 of EV that is involved in bone formation was reported earlier by Nahar et al.<sup>61</sup>, further  
250 supporting our findings.

251 The phenotypical changes observed in zebrafish embryos after Rab35-KD suggest that  
252 EV-transport is essential for BMP-signalling during embryonic development. The  
253 severity of the phenotypes is surprising, considering that BMP is thought to diffuse  
254 unaided. But whether the importance of EVs in BMP-signalling is due to their ability  
255 to mobilize BMPs or due to other reasons, remains to be investigated. A limitation of  
256 this study is that known factors involved in EV-secretion, that can be manipulated to  
257 inhibit the release of EVs, are also involved in essential cellular processes, especially  
258 endosomal trafficking, including receptor recycling<sup>29, 70, 71</sup>. Thus, unspecific effects of  
259 changes in Rab35-activity might add to the observed phenotype. Our experiments  
260 however show that inhibition of Rab35 in the endoderm affected BMP-signalling  
261 activity in cells of the zebrafish tailbud, which are mesoderm cells<sup>72</sup>. Processes that  
262 take part in computing the BMP-signal response in the mesodermal target cells, as for  
263 example BMP-receptor recycling, cannot be influenced by Rab35<sup>dn</sup> directly, that is  
264 exclusively expressed in the endoderm. This indicates, that a paracrine effect is likely  
265 responsible for the reduced Smad1/5/9-phosphorylation.

266 The finding, that EV-associated BMP2/4 is secreted by the endoderm, is intuitive, since  
267 the endoderm was already described to be responsible for secreting freely diffusing

268 BMP2/4 during early development<sup>40-42</sup>. Nevertheless, since BMP2/4 associate to EVs  
269 by binding to HSPGs on their surface should theoretically be able to catch free BMP2/4  
270 in the extracellular space. This would mean that EVs from cells, which are not secreting  
271 BMP2/4, could be able to influence BMP2/4-signaling by secreting BMP-tethering EVs,  
272 thereby modulating BMP gradient formation and thus BMP signalling. Whether this  
273 hypothesis is true, remains to be investigated in future studies.

274 In summary, we describe an additional mode of transport for BMPs during embryonic  
275 development. While future studies will have to show how EV-associated BMPs  
276 contribute to BMP-signalling as compared to previously known mechanisms, the  
277 findings presented here provide additional information, that will help to understand  
278 the formation of BMP-gradients.

279

## 280 **Experimental Procedures**

### 281 **Zebrafish care and maintenance**

282 All animal experiments have been performed in accordance with the guidelines of the  
283 state of Baden-Wuerttemberg and all experimental protocols. Wildtype zebrafish  
284 were used as basis for all experiments. For imaging, zebrafish embryos were mounted  
285 in 2% methyl-cellulose and analysed under the microscope.

### 286 **Inhibition of EV secretion**

287 Morpholinos were obtained from Gene Tools LLC. The morpholinos against Rab11 and  
288 Rab35 were designed to bind at the translation start site. The sequences were as  
289 follows: Rab11<sup>73</sup>: 5'-GTATTCGTCGTCTCGTGTCCCCATC-3'; Rab35<sup>74</sup>: 5'-  
290 AGAGGTGATCGTAGTCGCGGGCCAT-3'. MO-Cntr: non-targeting standard control  
291 (Gene Tools LLC). Morpholinos were solubilized in water at a stock-concentration of  
292 1 mM. Stock solutions were diluted with 200 mM KCl to working concentrations of  
293 125 µM–250 µM. The injection volume was 2 – 4 nL/embryo. Effective doses were  
294 determined for every morpholino separately.

295 Inhibition of EV secretion was verified by western blot analysis using an antibody  
296 targeting ALIX (see below). EVs of uninjected and MO-Cntr-injected zebrafish embryos  
297 were used as controls. Experiments showing large differences in ALIX-content of EVs  
298 between uninjected and MO-Cntr-injected zebrafish embryos were excluded.

### 299 **Cell Culture**

300 HEK293A-cells were maintained in Dulbecco's Modified Eagle Medium (DMEM)  
301 (Gibco) containing 10 % Foetal Calf Serum (FCS) (Gibco), 1 % L-Glutamine (Gibco) and  
302 1 % Penicillin/Streptavidin (Gibco). End2 cells<sup>43</sup> were maintained in DMEM/F-12

303 medium (Gibco) containing 7.5 % FCS and 1 % Penicillin/Streptavidin. All cells were  
304 cultured at 37 °C and 5 % CO<sub>2</sub> in a humid atmosphere. Transient transfections of  
305 plasmids were performed using Lipofectamine 2000 (Invitrogen) following the  
306 manufacturer's instructions.

### 307 **EV Purification of Cell Culture Medium**

308 Cells were grown to 70 % confluency. The medium was exchanged with fresh medium  
309 containing FCS, that was depleted from EVs by centrifugation at 100,000 g for 18 h  
310 and successively filtered through a 0.2 µm filter. After 24 h the conditioned medium  
311 was collected and EVs were isolated by ultracentrifugation following the protocol  
312 described by Gross et al.<sup>14</sup>.

### 313 **Nanoparticle Tracking Analysis**

314 The EV pellet were resuspended in PBS. Particle counts and size distribution were  
315 measured using a NanoSight LM10 (Malvern Instruments) equipped with a 405 nm  
316 laser.

### 317 **Electron Microscopy**

318 EVs resuspended in PBS were prepared for electron microscopy following the protocol  
319 described by Théry et al.<sup>28</sup>

### 320 **OptiPrep Gradient Centrifugation**

321 EV pellets were resuspended in 500 µL Homogenization Media (0.25 M sucrose, 10  
322 mM Tris-HCL, (pH 7.4)). 40 %, 20 %, 10 % and 5 % OptiPrep/Homogenization Media  
323 solutions were prepared. The gradient was created by layering 3 mL of the 40 %, 20 %  
324 and 10 % OptiPrep solutions and 2.5 mL of the 5 % OptiPrep solution in order. The EV  
325 sample was layered on top of the gradient. The gradients were ultracentrifuged at

326 100,000 g for 18 h at 4 °C. Fractions of 1 mL were collected beginning from the top of  
327 the gradient and diluted with PBS. EVs in each fraction were isolated by  
328 ultracentrifugation at 100,000 g for 3 h at 4 °C.

### 329 **Imaging EV uptake**

330 For labelling with PKH26 (Sigma Aldrich) the EV pellet was resuspended in 1 mL  
331 Diluent C. 2 µL of PKH26 was added and the samples were incubated for 30 min at  
332 room temperature. Afterwards the sample was diluted by adding 11 mL of PBS. The  
333 labelled EVs were collected by ultracentrifugation at 100,000 g for 3 h at 4 °C. The EV  
334 pellet was resuspended in PBS. Cells were treated with 50 µg/mL of PKH26-labelled  
335 EVs. Life-cell imaging was performed 5 h after treatment.

### 336 ***In vitro* BMP activity assay**

337 HEK293A cells seeded in 96-well plates were transfected with 10 ng pIS2-Renilla  
338 Control Vector and 100 ng pGL3-BRE:Luciferase<sup>37</sup>. The medium was exchanged to  
339 serum-free medium 1 h before treatment. Cells were either treated with EVs or PBS.  
340 16 h post treatment cells were analysed using the Dual Luciferase Reporter Assay  
341 system (Promega, Cat.-No. E1960) following the manufacturer's instructions. Renilla  
342 Luciferase activity was used to normalize Firefly Luciferase activity.

### 343 **Whole mount in situ hybridization**

344 The whole mount in situ hybridization was performed as previously described by  
345 Thisse et al.<sup>75</sup> The probes to detect nkx2.5 were generated using the primer pair  
346 5'-CGGGACATACTGAACCTGGA-3', 5'-TCTCCCAGACACGGTTTACC-3'. Staining intensity  
347 was quantified using Fiji (ImageJ). Images were contrasted consistently in each  
348 experiment. Each stained area (both heart fields) was segmented manually. The area



349 of the staining was normalized to the total area of the embryo. The background  
350 intensity was measured close to the stained area and used for background  
351 subtraction. The *nkx2.5*-expression was defined as the product of the background-  
352 corrected mean staining intensity and the normalized staining area.

### 353 **Whole mount immunofluorescence**

354 Zebrafish embryos fixed in 4 % PFA were dehydrated with an ascending methanol  
355 series. Before staining, the embryos were rehydrated with a descending methanol  
356 series and permeabilized by incubation with ice cold acetone for 8 min at -20 °C.  
357 Embryos were blocked in PBS with 1 % Triton-X100, 2 % BSA, 10 % sheep serum and  
358 1 % DMSO for 30 min before incubation with the primary antibody for at least 20 h at  
359 4 °C. Incubation with the secondary antibody was performed overnight at 4 °C. The  
360 staining intensity in the tail bud of the embryos was analysed in the same way as the  
361 *nkx2.5*-whole mount *in situ* stainings.

### 362 **Heparinase 3-treatment**

363 EVs resuspended in PBS were divided into two equal parts of which one was treated  
364 with 2 mIU/mL Heparinase 3 in reaction buffer (20 mM TrisHCl, 0.1 mg/mL BSA, 4 mM  
365 CaCl<sub>2</sub> (pH 7.5)) and the other with reaction buffer for 3 h at 37 °C. EVs were isolated  
366 from samples by ultracentrifugation with 100,000 g for 3 h at 4 °C before further  
367 analysis.

### 368 **Antibodies**

369 For western blotting experiments the following antibodies were used: GP96 (CST,  
370 #2104), TSG101 (Sigma Aldrich, AV38773), ALIX (Sigma Aldrich, sab4200476), Flotillin-

371 1 (BD Biosciences, 610821), LAMP1 (Sigma Aldrich, sab3500285), beta-Actin (Sigma  
372 Aldrich, A5441), pSmad1/5/9 (CST, #13820) and BMP2/4 (RnD Systems, MAB1128).

### 373 **Statistics**

374 Statistical tests used for analysis are indicated in the respective figure captions.

375 Significance levels are indicated as follows: ns: not significant; \*:  $p \leq 0.05$ ; \*\*:  $p \leq 0.01$ ;

376 \*\*\*:  $p \leq 0.001$ . If not indicated otherwise error bars represent the standard deviation.

377

### 378 **Acknowledgements**

379 We thank Prof. Dr. Michael Boutros for allowing us to perform NTA-measurements at

380 his lab, Ms. Hosser for taking the electron microscopy images, Prof. Dr. Mummery for

381 providing us with the End2-cell line, Prof. Dr. Mikael Simons for sharing Rab35-

382 constructs and Prof. Dr. De Robertis for the Venus-BMP2 construct.

383

### 384 **Author Contributions**

385 D.H. and T.D. designed the experiments and wrote the article. T.D., J.H. and L.J.

386 performed the experiments. T.D. analysed the data. H.A.K. and D.H. provided the

387 material, read and revised the article.

388

## 389 **References**

390

- 391 1. Perrimon, N., Pitsouli, C. & Shilo, B.Z. Signaling mechanisms controlling cell  
392 fate and embryonic patterning. *Cold Spring Harb Perspect Biol* **4**, a005975  
393 (2012).
- 394 2. Child, C.M. (Chicago, Ill., The University of Chicago Press, 1941).
- 395 3. Wolpert, L. Positional information and the spatial pattern of cellular  
396 differentiation. *J Theor Biol* **25**, 1-47 (1969).
- 397 4. Wolpert, L. Positional information and pattern formation. *Curr Top Dev Biol*  
398 **6**, 183-224 (1971).
- 399 5. Lander, A.D., Nie, Q. & Wan, F.Y. Do morphogen gradients arise by diffusion?  
400 *Dev Cell* **2**, 785-796 (2002).
- 401 6. Mizutani, C.M. et al. Formation of the BMP activity gradient in the  
402 *Drosophila* embryo. *Dev Cell* **8**, 915-924 (2005).
- 403 7. Crick, F. Diffusion in embryogenesis. *Nature* **225**, 420-422 (1970).
- 404 8. Wartlick, O., Kicheva, A. & González-Gaitán, M. Morphogen gradient  
405 formation. *Cold Spring Harb Perspect Biol* **1**, a001255 (2009).
- 406 9. Piccolo, S., Sasai, Y., Lu, B. & De Robertis, E.M. Dorsoventral patterning in  
407 *Xenopus*: inhibition of ventral signals by direct binding of chordin to BMP-  
408 4. *Cell* **86**, 589-598 (1996).
- 409 10. Sasai, Y. et al. *Xenopus* chordin: a novel dorsalizing factor activated by  
410 organizer-specific homeobox genes. *Cell* **79**, 779-790 (1994).
- 411 11. Eldar, A. et al. Robustness of the BMP morphogen gradient in *Drosophila*  
412 embryonic patterning. *Nature* **419**, 304-308 (2002).

- 413 12. Belenkaya, T.Y. et al. Drosophila Dpp morphogen movement is  
414 independent of dynamin-mediated endocytosis but regulated by the  
415 glypican members of heparan sulfate proteoglycans. *Cell* **119**, 231-244  
416 (2004).
- 417 13. Bornemann, D.J., Duncan, J.E., Staatz, W., Selleck, S. & Warrior, R.  
418 Abrogation of heparan sulfate synthesis in Drosophila disrupts the  
419 Wingless, Hedgehog and Decapentaplegic signaling pathways.  
420 *Development* **131**, 1927-1938 (2004).
- 421 14. Gross, J.C., Chaudhary, V., Bartscherer, K. & Boutros, M. Active Wnt proteins  
422 are secreted on exosomes. *Nat Cell Biol* **14**, 1036-1045 (2012).
- 423 15. Gradilla, A.C. et al. Exosomes as Hedgehog carriers in cytoneme-mediated  
424 transport and secretion. *Nat Commun* **5**, 5649 (2014).
- 425 16. Matusek, T. et al. The ESCRT machinery regulates the secretion and long-  
426 range activity of Hedgehog. *Nature* **516**, 99-103 (2014).
- 427 17. Webber, J., Steadman, R., Mason, M.D., Tabi, Z. & Clayton, A. Cancer  
428 exosomes trigger fibroblast to myofibroblast differentiation. *Cancer Res*  
429 **70**, 9621-9630 (2010).
- 430 18. Raposo, G. & Stoorvogel, W. Extracellular vesicles: exosomes,  
431 microvesicles, and friends. *J Cell Biol* **200**, 373-383 (2013).
- 432 19. Théry, C., Ostrowski, M. & Segura, E. Membrane vesicles as conveyors of  
433 immune responses. *Nat Rev Immunol* **9**, 581-593 (2009).
- 434 20. Whiteside, T.L. Tumor-Derived Exosomes and Their Role in Cancer  
435 Progression. *Adv Clin Chem* **74**, 103-141 (2016).

- 436 21. Kowal, J., Tkach, M. & Théry, C. Biogenesis and secretion of exosomes. *Curr*  
437 *Opin Cell Biol* **29**, 116-125 (2014).
- 438 22. de Jong, O.G. et al. Cellular stress conditions are reflected in the protein and  
439 RNA content of endothelial cell-derived exosomes. *J Extracell Vesicles* **1**  
440 (2012).
- 441 23. Yáñez-Mó, M. et al. Biological properties of extracellular vesicles and their  
442 physiological functions. *J Extracell Vesicles* **4**, 27066 (2015).
- 443 24. Haraszti, R.A. et al. High-resolution proteomic and lipidomic analysis of  
444 exosomes and microvesicles from different cell sources. *J Extracell Vesicles*  
445 **5**, 32570 (2016).
- 446 25. Caby, M.P., Lankar, D., Vincendeau-Scherrer, C., Raposo, G. & Bonnerot, C.  
447 Exosomal-like vesicles are present in human blood plasma. *Int Immunol* **17**,  
448 879-887 (2005).
- 449 26. Dawid, I.B. Developmental biology of zebrafish. *Ann N Y Acad Sci* **1038**, 88-  
450 93 (2004).
- 451 27. Vella, L.J. et al. A rigorous method to enrich for exosomes from brain tissue.  
452 *J Extracell Vesicles* **6**, 1348885 (2017).
- 453 28. Theyry, C., Amigorena, S., Raposo, G. & Clayton, A. Isolation and  
454 characterization of exosomes from cell culture supernatants and biological  
455 fluids. *Curr Protoc Cell Biol* **Chapter 3**, Unit 3 22 (2006).
- 456 29. Hsu, C. et al. Regulation of exosome secretion by Rab35 and its GTPase-  
457 activating proteins TBC1D10A-C. *J Cell Biol* **189**, 223-232 (2010).
- 458 30. Savina, A., Vidal, M. & Colombo, M.I. The exosome pathway in K562 cells is  
459 regulated by Rab11. *J Cell Sci* **115**, 2505-2515 (2002).

- 460 31. Savina, A., Fader, C.M., Damiani, M.T. & Colombo, M.I. Rab11 promotes  
461 docking and fusion of multivesicular bodies in a calcium-dependent  
462 manner. *Traffic* **6**, 131-143 (2005).
- 463 32. Mullins, M.C. et al. Genes establishing dorsoventral pattern formation in the  
464 zebrafish embryo: the ventral specifying genes. *Development* **123**, 81-93  
465 (1996).
- 466 33. Steinbeisser, H., Fainsod, A., Niehrs, C., Sasai, Y. & De Robertis, E.M. The role  
467 of gsc and BMP-4 in dorsal-ventral patterning of the marginal zone in  
468 *Xenopus*: a loss-of-function study using antisense RNA. *EMBO J* **14**, 5230-  
469 5243 (1995).
- 470 34. Hawley, S.H. et al. Disruption of BMP signals in embryonic *Xenopus*  
471 ectoderm leads to direct neural induction. *Genes Dev* **9**, 2923-2935 (1995).
- 472 35. Kishimoto, Y., Lee, K.H., Zon, L., Hammerschmidt, M. & Schulte-Merker, S.  
473 The molecular nature of zebrafish swirl: BMP2 function is essential during  
474 early dorsoventral patterning. *Development* **124**, 4457-4466 (1997).
- 475 36. Arkell, R. & Beddington, R.S. BMP-7 influences pattern and growth of the  
476 developing hindbrain of mouse embryos. *Development* **124**, 1-12 (1997).
- 477 37. Korchynskiy, O. & ten Dijke, P. Identification and functional  
478 characterization of distinct critically important bone morphogenetic  
479 protein-specific response elements in the Id1 promoter. *J Biol Chem* **277**,  
480 4883-4891 (2002).
- 481 38. Peterkin, T., Gibson, A. & Patient, R. GATA-6 maintains BMP-4 and Nkx2  
482 expression during cardiomyocyte precursor maturation. *EMBO J* **22**, 4260-  
483 4273 (2003).

- 484 39. Pyati, U.J., Webb, A.E. & Kimelman, D. Transgenic zebrafish reveal stage-  
485 specific roles for Bmp signaling in ventral and posterior mesoderm  
486 development. *Development* **132**, 2333-2343 (2005).
- 487 40. Nascone, N. & Mercola, M. An inductive role for the endoderm in *Xenopus*  
488 cardiogenesis. *Development* **121**, 515-523 (1995).
- 489 41. Schultheiss, T.M., Xydas, S. & Lassar, A.B. Induction of avian cardiac  
490 myogenesis by anterior endoderm. *Development* **121**, 4203-4214 (1995).
- 491 42. Lough, J. et al. Combined BMP-2 and FGF-4, but neither factor alone,  
492 induces cardiogenesis in non-precardiac embryonic mesoderm. *Dev Biol*  
493 **178**, 198-202 (1996).
- 494 43. Mummery, C.L., Feijen, A., van der Saag, P.T., van den Brink, C.E. & de Laat,  
495 S.W. Clonal variants of differentiated P19 embryonal carcinoma cells  
496 exhibit epidermal growth factor receptor kinase activity. *Dev Biol* **109**,  
497 402-410 (1985).
- 498 44. Alexander, J. & Stainier, D.Y. A molecular pathway leading to endoderm  
499 formation in zebrafish. *Curr Biol* **9**, 1147-1157 (1999).
- 500 45. Willert, K. et al. Wnt proteins are lipid-modified and can act as stem cell  
501 growth factors. *Nature* **423**, 448-452 (2003).
- 502 46. Porter, J.A., Young, K.E. & Beachy, P.A. Cholesterol modification of hedgehog  
503 signaling proteins in animal development. *Science* **274**, 255-259 (1996).
- 504 47. Chamoun, Z. et al. Skinny hedgehog, an acyltransferase required for  
505 palmitoylation and activity of the hedgehog signal. *Science* **293**, 2080-2084  
506 (2001).

- 507 48. Bornemann, D.J., Park, S., Phin, S. & Warrior, R. A translational block to  
508 HSPG synthesis permits BMP signaling in the early *Drosophila* embryo.  
509 *Development* **135**, 1039-1047 (2008).
- 510 49. O'Connell, M.P. et al. HSPG modulation of BMP signaling in fibrodysplasia  
511 ossificans progressiva cells. *J Cell Biochem* **102**, 1493-1503 (2007).
- 512 50. Christianson, H.C., Svensson, K.J., van Kuppevelt, T.H., Li, J.P. & Belting, M.  
513 Cancer cell exosomes depend on cell-surface heparan sulfate  
514 proteoglycans for their internalization and functional activity. *Proc Natl*  
515 *Acad Sci U S A* **110**, 17380-17385 (2013).
- 516 51. Lohse, D.L. & Linhardt, R.J. Purification and characterization of heparin  
517 lyases from *Flavobacterium heparinum*. *J Biol Chem* **267**, 24347-24355  
518 (1992).
- 519 52. Bier, E. & De Robertis, E.M. EMBRYO DEVELOPMENT. BMP gradients: A  
520 paradigm for morphogen-mediated developmental patterning. *Science*  
521 **348**, aaa5838 (2015).
- 522 53. Francois, V., Solloway, M., O'Neill, J.W., Emery, J. & Bier, E. Dorsal-ventral  
523 patterning of the *Drosophila* embryo depends on a putative negative  
524 growth factor encoded by the short gastrulation gene. *Genes Dev* **8**, 2602-  
525 2616 (1994).
- 526 54. Shimmi, O., Umulis, D., Othmer, H. & O'Connor, M.B. Facilitated transport of  
527 a Dpp/Scw heterodimer by Sog/Tsg leads to robust patterning of the  
528 *Drosophila* blastoderm embryo. *Cell* **120**, 873-886 (2005).
- 529 55. Bollenbach, T. et al. Precision of the Dpp gradient. *Development* **135**, 1137-  
530 1146 (2008).



- 531 56. Pomreinke, A.P. et al. Dynamics of BMP signaling and distribution during  
532 zebrafish dorsal-ventral patterning. *Elife* **6** (2017).
- 533 57. Zinski, J. et al. Systems biology derived source-sink mechanism of BMP  
534 gradient formation. *Elife* **6** (2017).
- 535 58. Schwank, G. & Basler, K. Regulation of organ growth by morphogen  
536 gradients. *Cold Spring Harb Perspect Biol* **2**, a001669 (2010).
- 537 59. González, F., Swales, L., Bejsovec, A., Skaer, H. & Martinez Arias, A. Secretion  
538 and movement of wingless protein in the epidermis of the *Drosophila*  
539 embryo. *Mech Dev* **35**, 43-54 (1991).
- 540 60. Hsiung, F., Ramirez-Weber, F.A., Iwaki, D.D. & Kornberg, T.B. Dependence  
541 of *Drosophila* wing imaginal disc cytonemes on Decapentaplegic. *Nature*  
542 **437**, 560-563 (2005).
- 543 61. Nahar, N.N., Missana, L.R., Garimella, R., Tague, S.E. & Anderson, H.C. Matrix  
544 vesicles are carriers of bone morphogenetic proteins (BMPs), vascular  
545 endothelial growth factor (VEGF), and noncollagenous matrix proteins. *J*  
546 *Bone Miner Metab* **26**, 514-519 (2008).
- 547 62. Hong, B.S. et al. Colorectal cancer cell-derived microvesicles are enriched  
548 in cell cycle-related mRNAs that promote proliferation of endothelial cells.  
549 *BMC Genomics* **10**, 556 (2009).
- 550 63. Hurwitz, S.N. et al. Proteomic profiling of NCI-60 extracellular vesicles  
551 uncovers common protein cargo and cancer type-specific biomarkers.  
552 *Oncotarget* **7**, 86999-87015 (2016).
- 553 64. Xiao, Z. et al. Analysis of the extracellular matrix vesicle proteome in  
554 mineralizing osteoblasts. *J Cell Physiol* **210**, 325-335 (2007).

- 555 65. Gonzalez-Begne, M. et al. Proteomic analysis of human parotid gland  
556 exosomes by multidimensional protein identification technology  
557 (MudPIT). *J Proteome Res* **8**, 1304-1314 (2009).
- 558 66. Skog, J. et al. Glioblastoma microvesicles transport RNA and proteins that  
559 promote tumour growth and provide diagnostic biomarkers. *Nat Cell Biol*  
560 **10**, 1470-1476 (2008).
- 561 67. Demory Beckler, M. et al. Proteomic analysis of exosomes from mutant  
562 KRAS colon cancer cells identifies intercellular transfer of mutant KRAS.  
563 *Mol Cell Proteomics* **12**, 343-355 (2013).
- 564 68. Bruno, S. et al. Mesenchymal stem cell-derived microvesicles protect  
565 against acute tubular injury. *J Am Soc Nephrol* **20**, 1053-1067 (2009).
- 566 69. Fraser, K.B. et al. LRRK2 secretion in exosomes is regulated by 14-3-3. *Hum*  
567 *Mol Genet* **22**, 4988-5000 (2013).
- 568 70. Kouranti, I., Sachse, M., Arouche, N., Goud, B. & Echard, A. Rab35 regulates  
569 an endocytic recycling pathway essential for the terminal steps of  
570 cytokinesis. *Curr Biol* **16**, 1719-1725 (2006).
- 571 71. Allaire, P.D. et al. Interplay between Rab35 and Arf6 controls cargo  
572 recycling to coordinate cell adhesion and migration. *J Cell Sci* **126**, 722-731  
573 (2013).
- 574 72. Esterberg, R., Delalande, J.M. & Fritz, A. Tailbud-derived Bmp4 drives  
575 proliferation and inhibits maturation of zebrafish chordamesoderm.  
576 *Development* **135**, 3891-3901 (2008).

577 73. Jopling, H.M. et al. Endosome-to-Plasma Membrane Recycling of VEGFR2  
578 Receptor Tyrosine Kinase Regulates Endothelial Function and Blood Vessel  
579 Formation. *Cells* 3, 363-385 (2014).

580 74. Dantas de Cantos, I. (UMI Dissertation Publishing, 2004).

581 75. Thisse, C. & Thisse, B. High-resolution in situ hybridization to whole-mount  
582 zebrafish embryos. *Nat Protoc* 3, 59-69 (2008).

583

## 584 Figures

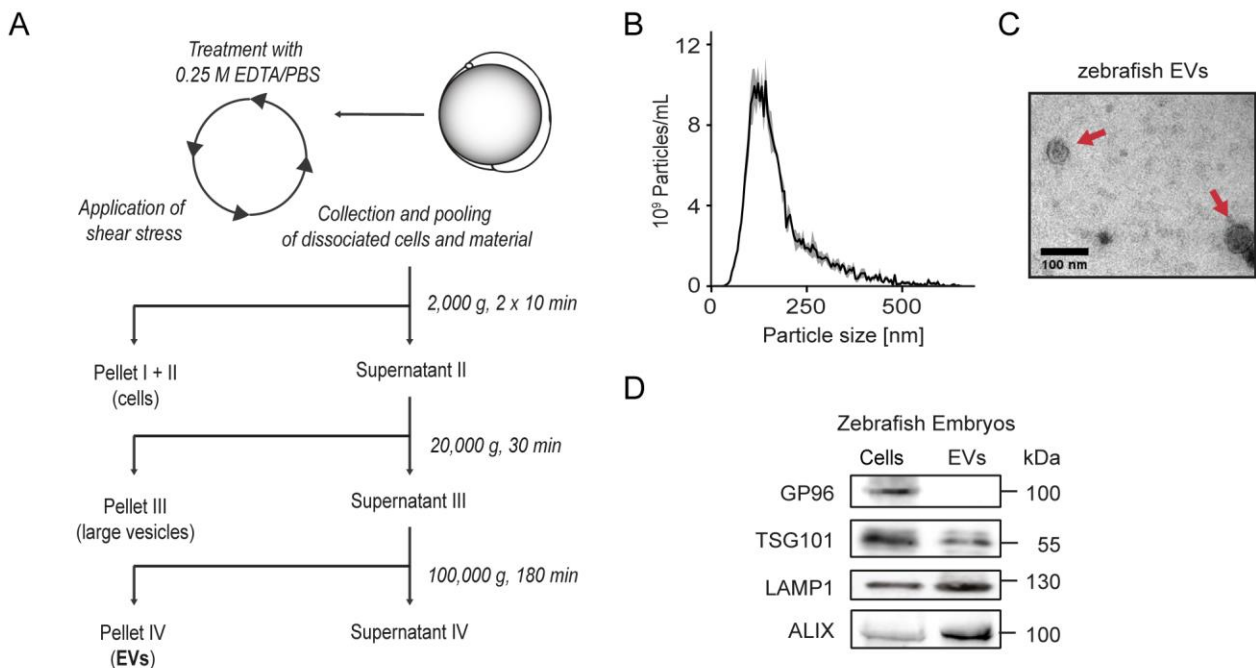

585 **Figure 1 | Isolation of EVs from zebrafish embryos.** (A) Schematic representation of  
586 the protocol used to isolate EVs from zebrafish embryos. Experiments to verify the  
587 purity of the EV-isolates were performed with EVs isolated from zebrafish embryos at  
588 bud stage (10 hpf): (B) The particle size distribution in the EV-isolates was determined  
589 by NTA measurements. The mean of five measurements of the same sample is

590 depicted (black line) with the standard deviation (grey area). (C) The morphology and  
591 size of EVs was observed with transmission electron microscopy. Scale bar: 100 nm.  
592 (D) Cell lysate (Pellet I/II) and EVs (Pellet IV) from zebrafish embryos were  
593 characterized using immunoblots with antibodies detecting GP96, TSG101, LAMP1  
594 and ALIX.  
595

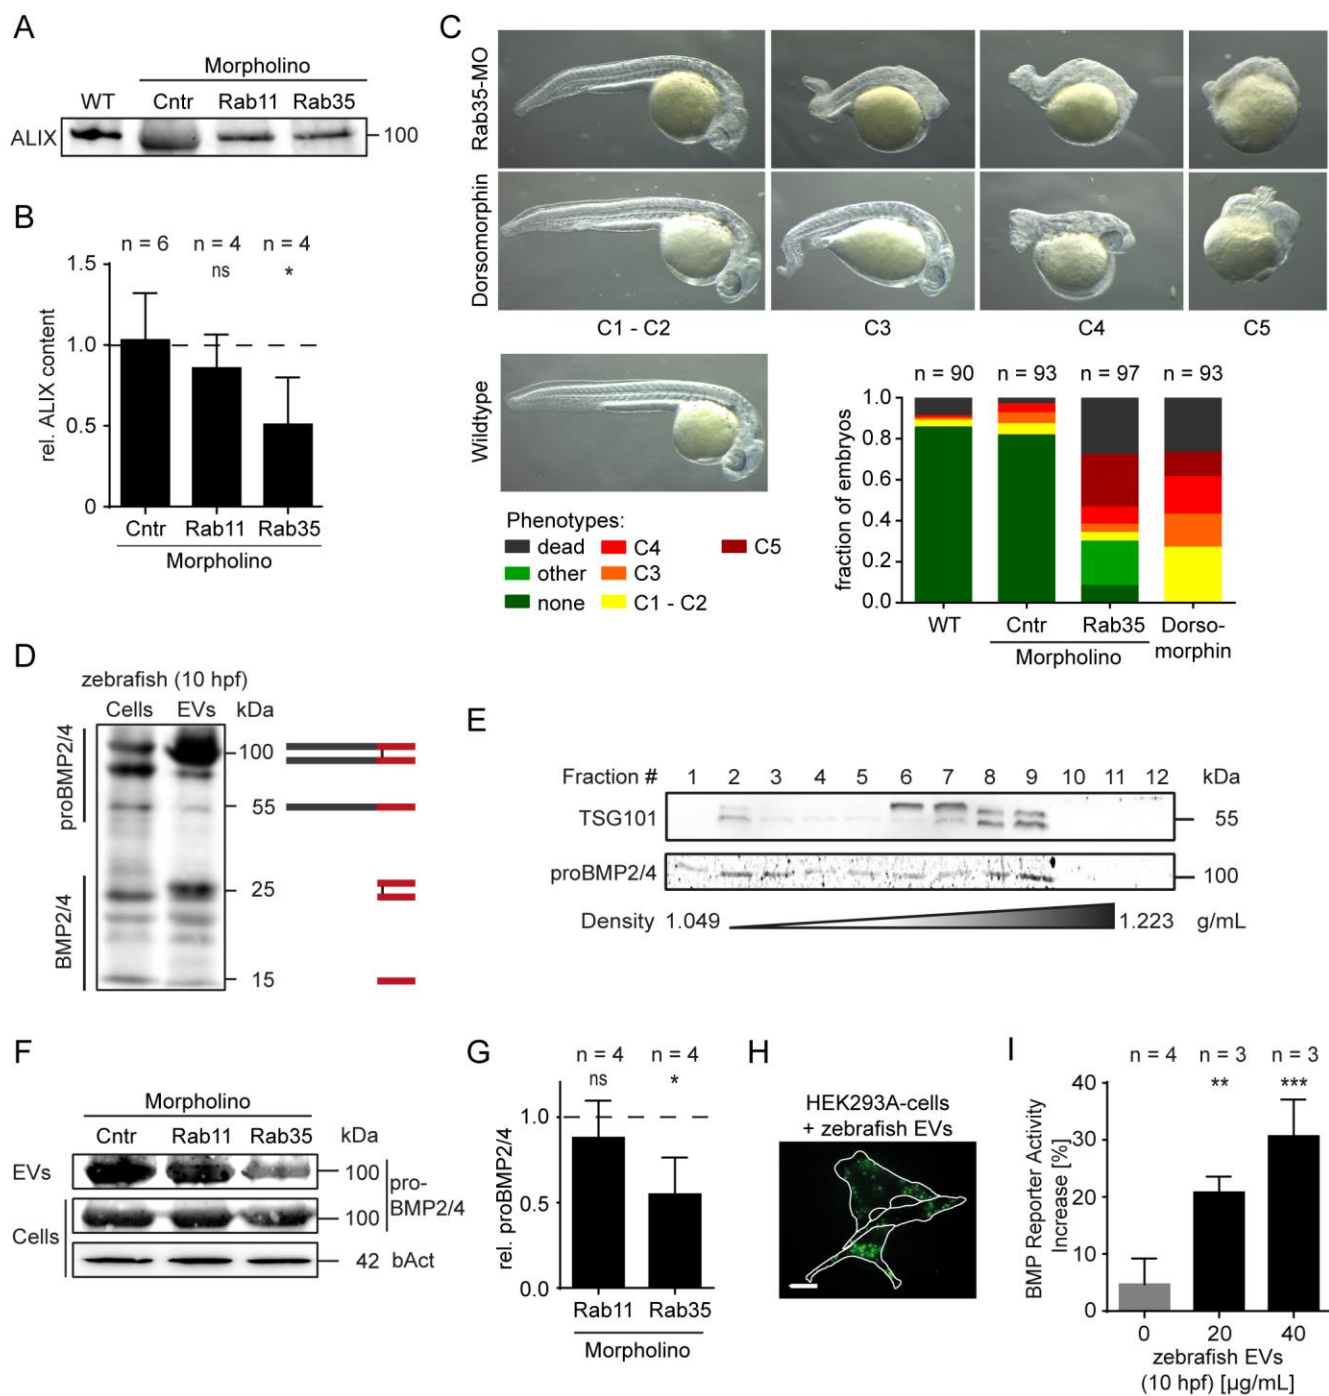

596

597 **Figure 2 | BMP2 and/or BMP4 are transported by EVs.** (A) Zebrafish embryos were  
598 injected with either 250  $\mu$ M Cntr-MO, 125  $\mu$ M Rab11a-MO or 250  $\mu$ M Rab35-MO at  
599 the one-cell stage. EVs were isolated from these zebrafish embryos at bud stage  
600 (10 hpf). Western blot analysis with antibodies against ALIX were used to estimate the  
601 EV-content of the isolates. The quantification of the western blot signals is plotted in  
602 (B). The dashed line represents the measured signal intensity of the wildtype sample,  
603 which was used as a normalizer. The samples were compared to the Cntr-MO sample  
604 using ANOVA with Tukey's post hoc test. (C) Images of Rab35-morphants at 24 hpf  
605 displaying the spectrum of phenotype severities, resembling dorsalization. For  
606 comparison, zebrafish treated with the BMP-signalling inhibitor 10  $\mu$ M dorsomorphin  
607 are shown. The embryos were classified by phenotype severity following the  
608 suggestions made by Mullins et al.<sup>32</sup>. The quantification of the fraction of embryos in  
609 the respective classes is plotted below the images. (D) EVs were isolated from  
610 zebrafish embryos at bud stage (10 hpf) and used in western blot experiments under  
611 non-reducing conditions to detect BMP2/4. Multiple preprocessing intermediates of  
612 BMP2/4, which are depicted schematically next to the respective protein bands, were  
613 detected (dark grey: prodomain; red: ligand domain). (E) EV isolates from zebrafish  
614 embryos were further separated on an OptiPrep™-gradient. The gradient was split  
615 into 12 fractions, which were investigated by immunoblotting with antibodies  
616 targeting TSG101 and BMP2/4. (F) Cell lysate and EVs from Cntr-, Rab11- and Rab35-  
617 morphants were investigated for differences in BMP2/4-content by western blot  
618 analysis. The quantification of BMP2/4-band intensities in EV isolates is shown in (G).  
619 The samples were compared to the normalized mean of the Cntr-morphants (dashed

620 line) using one-sample t-tests with Bonferroni correction for multiple testing. (H)

621 HEK293A-cells were treated with PKH26-labeled EVs isolated from zebrafish embryos

622 and imaged after 5 h. White lines depict cell borders. The scale bar represents 20  $\mu\text{m}$ .

623 (I) HEK293A-cells transiently expressing pGL3-BRE:Luciferase and pIS2-Renilla were

624 treated with unlabelled zebrafish EVs and used in dual luciferase assay 16 h after

625 treatment. Values were normalized to an independent untreated control sample.

626 Samples were compared using ANOVA with Tukey's post hoc test.

627

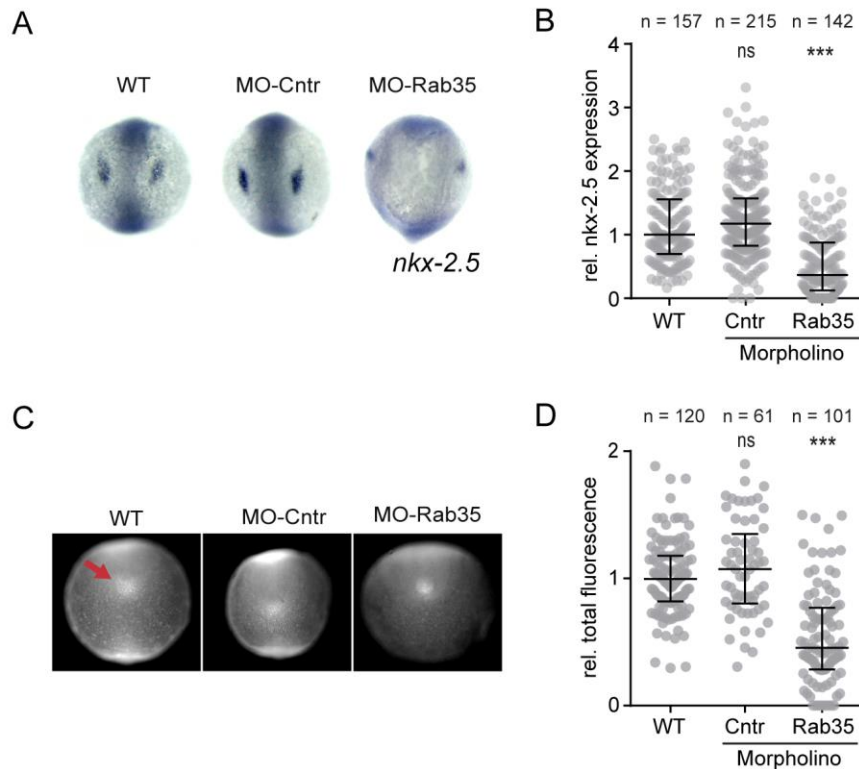

628

629 **Figure 3 | Rab35-KD reduces BMP2/4-dependent signalling activity.** Wildtype

630 zebrafish embryos, Cntr- and Rab35-morphants were collected at the 7-somite stage.

631 (A-B) Whole mount *in situ* hybridizations was performed to detect *nkx-2.5*. Image

632 analysis-based quantification was used to measure the *nkx-2.5* expression in the

633 embryos. (C) Typical whole mount immunofluorescence stainings detecting

634 phosphorylated Smad1/5/9 are shown. The tail bud is indicated by the red arrow. (D)

635 The Smad1/5/9-phosphorylation was quantified in the tail bud. The total fluorescence

636 is defined by the product of the stained area, which was normalized to the area of the

637 embryo, and the background corrected fluorescence intensity. All statistical

638 comparisons were performed by using the Kruskal-Wallis-Test with Dunn's post hoc

639 test. In the plots (C, D) the middle lines represent the median and whiskers represent

640 the 25 % and 75 %-quantiles.



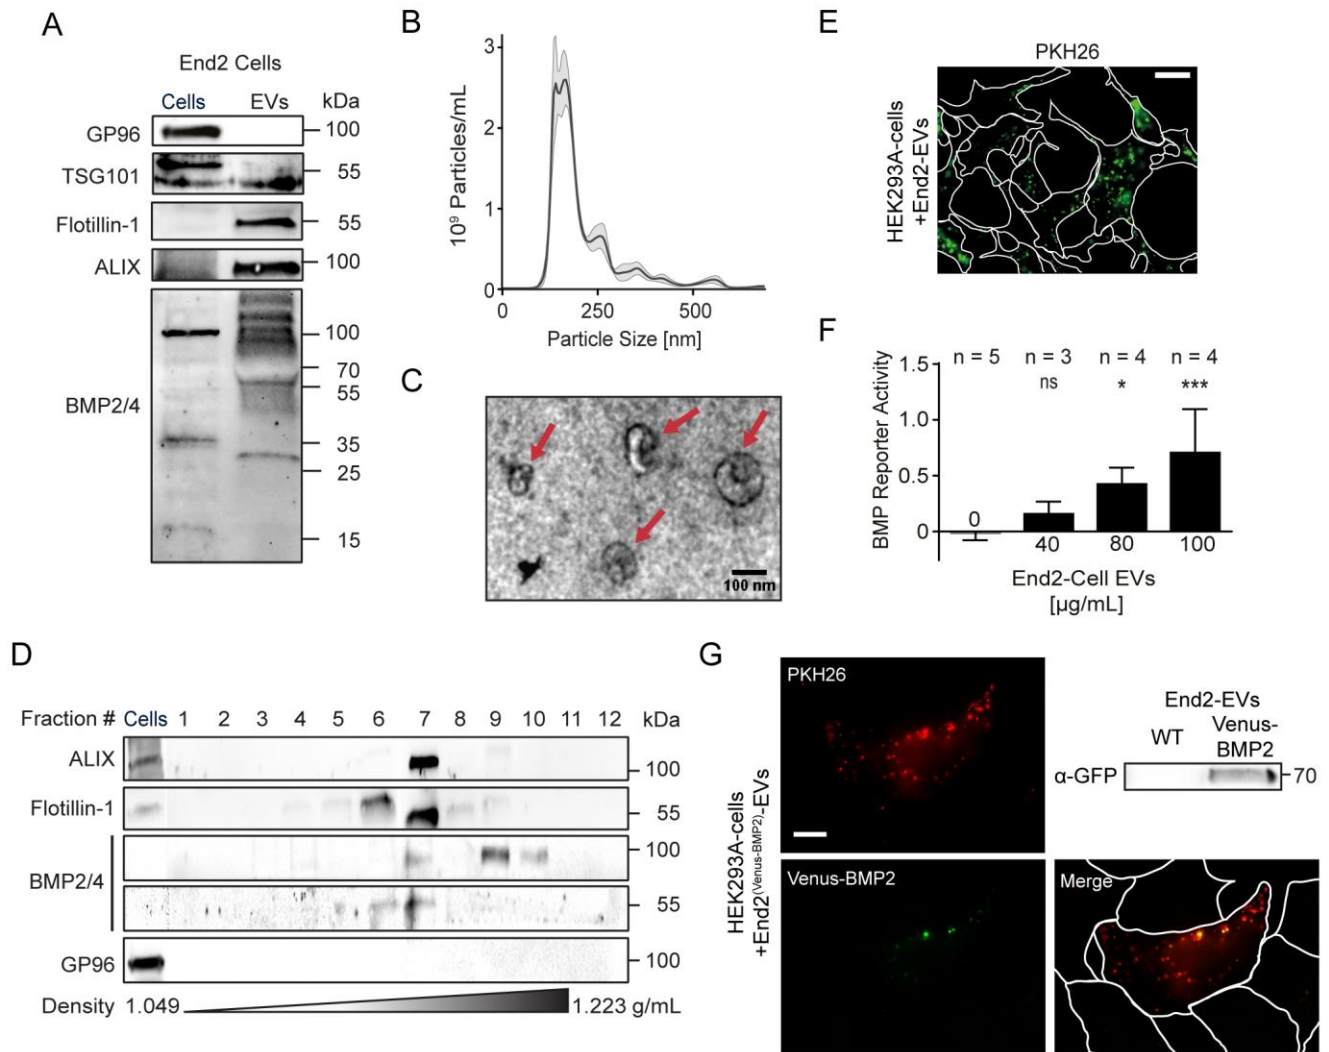

641

642 **Figure 4 | The endoderm is a source for EV-associated BMP2/4.** EVs were isolated

643 from End2-cells following the protocol described by Gross et al.<sup>14</sup>. (A) Western blot

644 analysis of End2 cell lysates and End2 EVs using antibodies targeting GP96, TSG101,

645 Flotillin-1, ALIX and BMP2/4. (B) NTA-measurement of a representative End2 EV-

646 isolate. The black line represents the mean of five consecutive measurements. The

647 grey area depicts the standard deviation of these measurements. (C) Representative

648 electron microscopy image of End2-EVs. Red arrows mark exosome-sized EVs. The

649 scale bar represents 100 nm. (D) OptiPrep™-gradient centrifugation was performed

650 on End2-EV isolates. Gradients were separated into 12 fractions and analysed by  
651 western blotting. (E) HEK293A-cells were treated with PKH26-labeled End2-EVs for 5 h  
652 before live-cell imaging. The scale represents 20  $\mu\text{m}$ . White lines represent cell  
653 borders. (F) HEK293A-cells transfected with pGL3-BRE:Luciferase and pIS2-Renilla  
654 were treated with End2-EVs for 16 h. BMP-signalling activity was measured using a  
655 dual luciferase assay. Values were normalized to an independent untreated control  
656 sample. Samples were compared using ANOVA with Tukey's post hoc test. (G) EVs  
657 were isolated from End2-cells transfected with a plasmid encoding Venus-BMP.  
658 Western blotting was used to show the presence of Venus-BMP in EV-isolates.  
659 HEK293A-cells treated with PKH26-labeled End2<sup>Venus BMP</sup>-EVs for 5 h. The scale bar  
660 represents 20  $\mu\text{m}$ . The white lines represent cell borders. Merged image shows co-  
661 localization of Venus-BMP and PKH26, indicating association of BMP with EVs.  
662

A

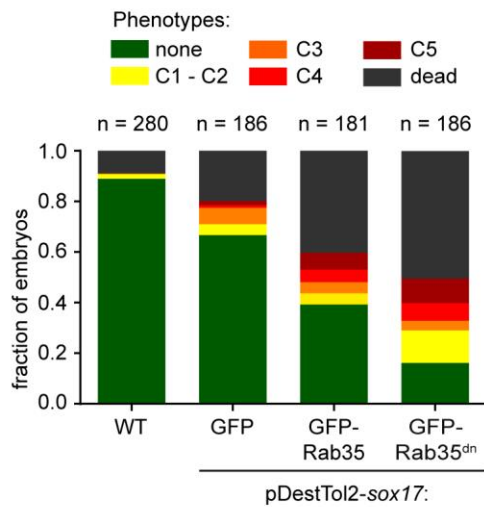

B

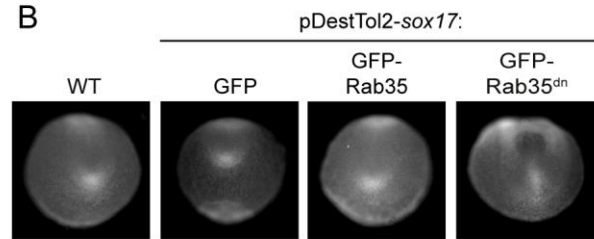

C

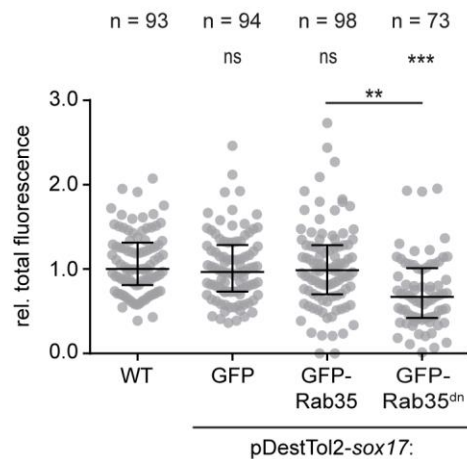

663

664 **Figure 5 | EV-secretion from the endoderm is needed for BMP-signalling during early**

665 **development.** Zebrafish embryos were injected with a pDestTol2 vector encoding

666 either GFP, GFP-Rab35 or the dominant negative GFP-Rab35<sup>N120I</sup> (dn) under the

667 transcriptional control of the *sox17*-promoter. (A) Phenotypes were assessed at

668 24 hpf. (B) Whole mount immunofluorescence stainings were used to label

669 pSmad1/5/9. Embryos were imaged in the posterior view. (C) The pSmad1/5/9

670 labelling intensity in the tail bud was quantified. The distributions were compared

671 using the Kruskal-Wallis-test in combination with Dunn's post hoc test.

672

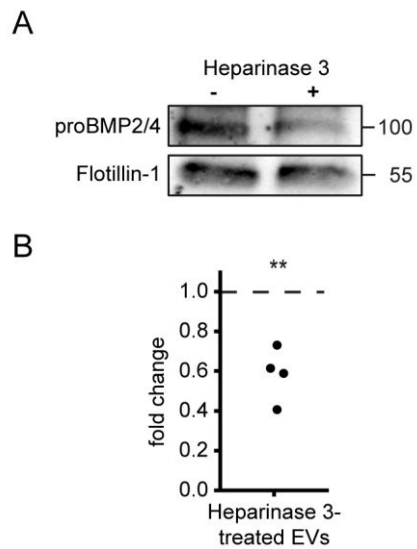

673

674 **Figure 6 | BMP2/4 is tethered to EV-surfaces by binding to HSPGs.** End2-EV isolates

675 were split into two equal fractions and either treated with Heparinase 3 or with

676 Heparinase 3 reaction buffer. (A) Representative immunoblot of Heparinase 3-treated

677 and control EV-samples. (B) proBMP2/4-band intensities were normalized with the

678 respective Flotillin-1-band intensities. The Heparinase 3-treated sample was further

679 normalized to the control and a one-sample t-test was used to determine whether the

680 amount of proBMP2/4 in EVs was significantly reduced after Heparinase 3-treatment.

681

## 682 Supplementary Information

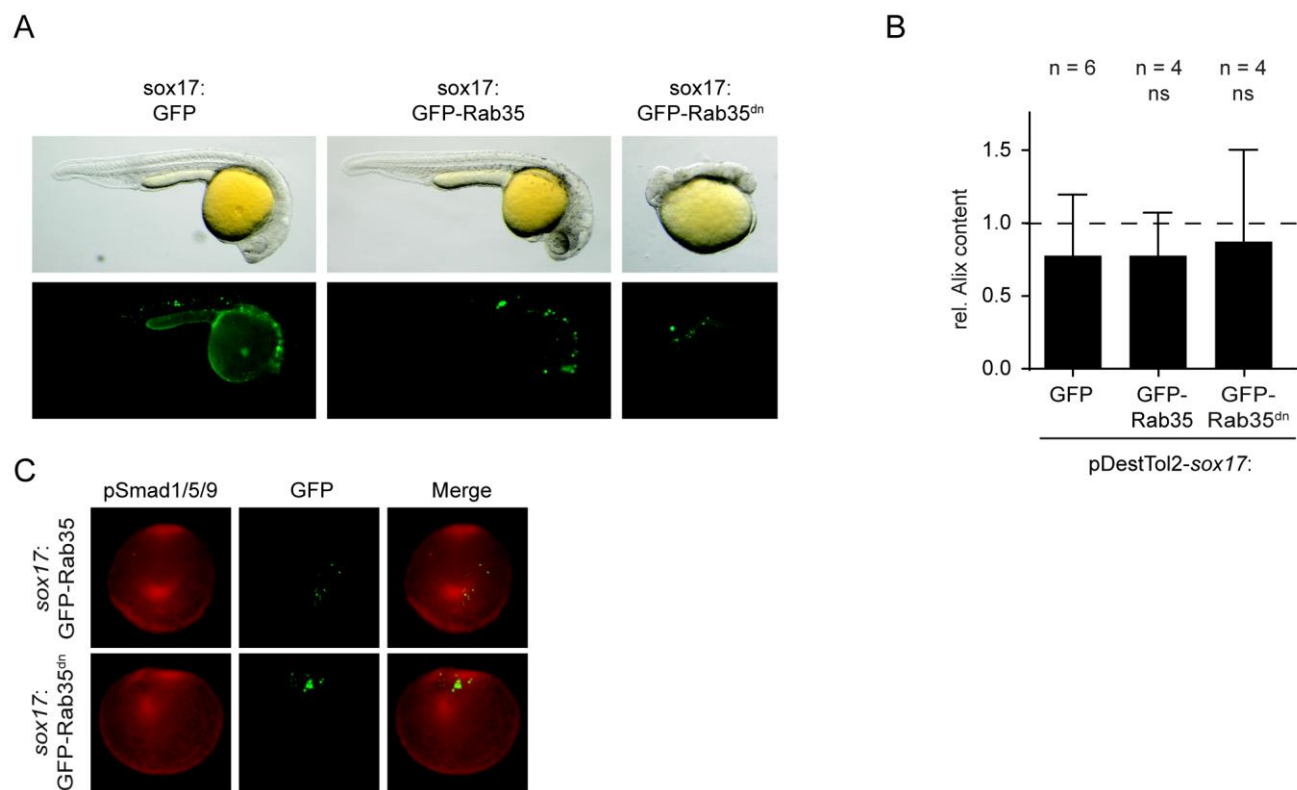

683

684 **Figure S1 | Mosaic expression of dominant negative Rab35 in the endoderm does**

685 **not result in a measurable reduction in secreted EVs.** (A) Images of zebrafish embryos

686 at 24 hpf expressing either pDestTol2-sox17:GFP, pDestTol2-sox17:GFP-Rab35,

687 pDestTol2-sox17:GFP-Rab35<sup>dn</sup>. (B) The amount of secreted EVs in transgene-

688 expressing zebrafish was measured by determining the ALIX-content in EV-isolates of

689 10 hpf-zebrafish embryos using western blotting. The values were normalized to the

690 wildtype-control and the means were compared using ANOVA and Tukey's post hoc

691 test. (C) Representative images showing the merge of the GFP-fluorescence

692 representing the transgene and pSmad1/5/9-immuno fluorescence staining.

693

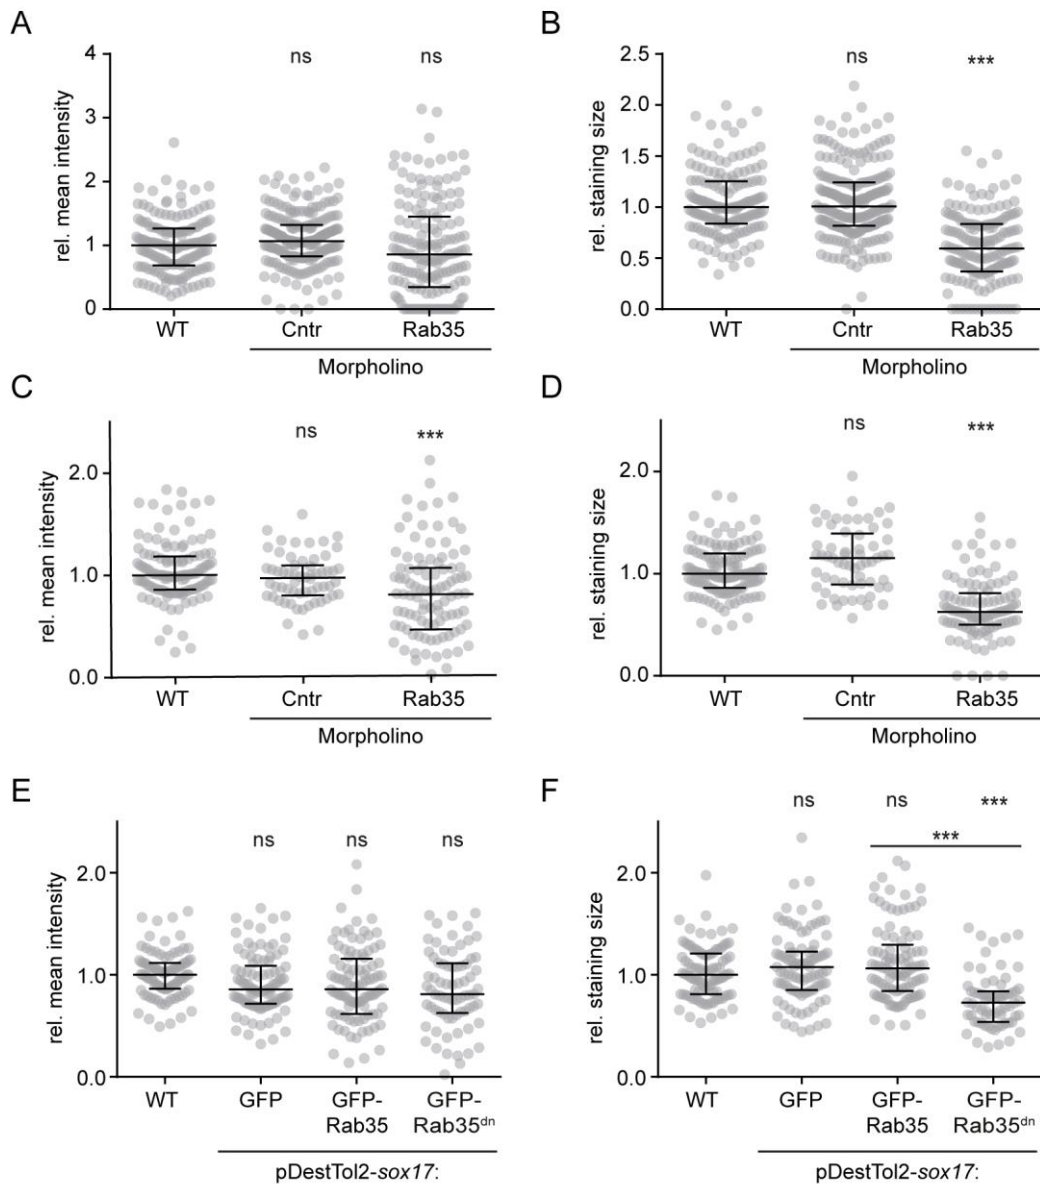

694

695 **Figure S2 | The staining area is the predominant factor determining the reduced *in***

696 ***in vivo* BMP-signalling response after Inhibition of EV-secretion.** Scatter-whisker-charts

697 plotting the parameters used to calculate the *nkx2.5*-expression (A, B; Figure 3B) and

698 total fluorescence in the tail buds of pSmad1/5/9 immunofluorescence stainings (C,

699 D; Figure 3D) in Rab35-morphants as well as the total fluorescence in pSmad1/5/9-

700 immunofluorescence stainings of zebrafish embryos expressing GFP-Rab35<sup>dn</sup> in the

701 endoderm (E, F; Figure 5D). (A, C, E) The background-corrected mean intensity  
702 measured in the labelled regions of interest. (B, D, F) The area of the regions of interest  
703 normalized with the area of the embryo. Sample distributions were compared using  
704 the Kruskal-Wallis-test with Dunn's post hoc test.
